# Supplementary material
Source: publisher figshare collection journal article supplement (https://sage.figshare.com/ndownloader/files/36569361)
Supplement: Supplementary file 1 [file 36569361]

## Sheet: CA ND factor_2021 04 05_MT
SID	SID2	CA_Index	Date	Site	Group	DOB	Age	Gender	Ethnicity	Other	Maternal_Age	Maternal_Ed	IDM	GDM	Mat_hemorr	MgSO4	Plac_previa	Plac_abrupt	Other_comp	Birth_wt	Current_wt	Birth_length	Birth_HC	GA	Ballard	Apgar_1min	Apgar_5min	Birth_cyan	Cord_pH	Cord_CO2	Cord_O2	Cord_bicarb	Cord_BE	Birth_type	Reason_CS	Other_CS	Birth_comp	Other_birth_co	Birth_resus	Other_birth_re	Cardiac_arrest	Cardiac_arr_le	Cardiac_arr_ti	PDA	PFO	Feeding	Tube_feed	Curr_meds	Cardiac_dx
CA1	1	2.02	2016-03-31	1	0	2016-03-24	7	1	1		37	#NULL!	0	0	0	0	0	0		3.23	#NULL!	50.8	35	39	#NULL!	8	9	0	7.26	53	20	23.8	-3	1	2		0		2		0			0	0	1	0	0	0
CA2	2	-0.29	2016-04-23	1	1	2016-04-22	1	0	1		31	#NULL!	0	0	0	0	0	1		2.83	2.83	48	31	38.6	39	8	9	1	7.27	#NULL!	#NULL!	#NULL!	#NULL!	0			3	multiple variable decels	0		0			2	1	0	0	1	15
CA3	3	-1.42	2016-04-30	1	1	2016-04-29	1	0	1		20	#NULL!	0	0	0	0	0	0		2.84	2.845	47	32	38.2	38	9	9	0	7.3	53	50	26	1.5	0			0		0		0			2	1	0	0	1	15
CA4	4	-2.49	2016-06-20	1	1	2016-06-20	0	1	0		35	#NULL!	0	0	0	0	0	0		2.89	2.89	48	34	39.2	39	9	9	1	#NULL!	#NULL!	#NULL!	#NULL!	#NULL!	1	0		1		0		0			2	1	0	0	1	15
CA5	5	0.81	2016-06-23	1	0	2016-06-14	9	1	0		33	#NULL!	0	0	0	0	0	0		2.7	2.6	46.25	35	37.4	#NULL!	8	9	0	#NULL!	#NULL!	#NULL!	#NULL!	#NULL!	1	2		0		0		0			0	0	1	0	0	0
CA6	6	-1.5	2016-06-28	1	1	2016-06-25	3	1	0		37	#NULL!	0	0	0	0	0	0		4.035	4.14	51	37	39	#NULL!	8	9	0	#NULL!	#NULL!	#NULL!	#NULL!	#NULL!	0			0		0		0			2	2	1	0	1	13
CA7	7	-2.29	2016-07-05	1	0	2016-06-29	6	1	0		32	#NULL!	0	0	0	0	0	0		3.912	3.6004	50.8	36.5	40.5	#NULL!	7	9	0	#NULL!	#NULL!	#NULL!	#NULL!	#NULL!	1	3	too big	0		0		0			0	0	1	0	0	0
CA8	8	-3.63	2016-07-16	1	1	2016-07-14	2	0	0		30	#NULL!	0	0	0	0	0	0		3.55	3.5	53	36	39.3	39	8	8	1	#NULL!	#NULL!	#NULL!	#NULL!	#NULL!	1	3	failure to progress	3	decels	0		0			2	2	1	0	1	10
CA9	9	-3.58	2016-07-19	1	1	2016-07-18	1	1	1		27	#NULL!	0	0	0	0	0	0	Maternal herpes zoster	3.265	3.03	50	35.5	39.2	39	5	8	1	7.36	40.2	33.7	22.1	-2.6	1	2				2		0			2	2	0	0	1	7
CA10	10	-1.77	2016-07-20	2	0	2016-07-17	3	0	1		21	#NULL!	0	0	0	0	0	0		3.231	2.92	50.8	33.5	38.2	#NULL!	8	9	0	#NULL!	#NULL!	#NULL!	#NULL!	#NULL!	0			0		0		0			0	0	1	0	0	0
CA11	11	-3.25	2016-07-24	1	1	2016-07-20	4	0	5	Caucasian/Latino	37	#NULL!	0	0	0	0	0	0		4.223	4.5	49	35.5	39.6	40	8	9	1	#NULL!	#NULL!	#NULL!	#NULL!	#NULL!	0			0		0		0			2	2	1	1	1	3
CA12	12	-0.63	2016-07-25	1	1	2016-07-20	5	1	0		30	#NULL!	0	0	0	0	0	0		3.685	3.8	50	35.5	39.6	#NULL!	8	9	1	#NULL!	#NULL!	#NULL!	#NULL!	#NULL!	0			0		0		0			2	2	1	0	1	9
CA13	13	4.15	2016-08-01	1	0	2016-07-22	10	1	0		29	#NULL!	0	0	0	0	0	0		2.835	2.651	47	33	36.2	#NULL!	9	9	0	#NULL!	#NULL!	#NULL!	#NULL!	#NULL!	0			0		0		0			0	0	1	0	0	0
CA14	14	-3.58	2016-08-03	1	1	2016-07-24	10	0	2	Mongolian	24	#NULL!	0	0	0	0	0	0		4.2	4.75	55	38	40.5	#NULL!	#NULL!	#NULL!	1	#NULL!	#NULL!	#NULL!	#NULL!	#NULL!	0			3	vacuum						2	2	0	0	1	15
CA15	15	-3	2016-08-03	1	1	2016-08-03	0	0	1		33	#NULL!	0	1	0	0	0	0		2.41	2.41	45	29.5	37	#NULL!	4	8	1	#NULL!	#NULL!	#NULL!	#NULL!	#NULL!	0			0		2		0			2		0	0	1	10
CA16	16	-0.29	2016-09-02	1	1	2016-09-02	0	1	1		25	#NULL!	1	0	0	0	0	0	Maternal fever, prolonged	2.53	2.53	49	32	39.2	38	1	8	0	7.14	69	5	23.5	-7.3	1	3	failed induction	2		2	intubated and suctioned	0			2	2	0	0	1	9
CA17	17	-0.37	2016-09-12	2	0	2016-09-08	4	1	5	Causcasian/Asian	31	#NULL!	1	0	0	0	0	0	Mat. fever	3.118	3.005	49	32	38	#NULL!	#NULL!	#NULL!	0	#NULL!	#NULL!	#NULL!	#NULL!	#NULL!	0			0		0		0			0	0	1	0	0	0
CA18	18	1.03	2016-09-14	2	0	2016-09-07	7	1	1		39	#NULL!	0	0	0	0	0	0		2.92	2.835	48.89	34	40	#NULL!	#NULL!	#NULL!	0	#NULL!	#NULL!	#NULL!	#NULL!	#NULL!	1	3	decreased amniotic fluid	0		0		0			0	0	1	0	0	0
CA19	19	10.74	2016-09-16	1	0	2016-09-09	7	0	0		32	#NULL!	0	0	0	0	0	0		3.515	3.515	50.8	35	40	#NULL!	9	9	0	#NULL!	#NULL!	#NULL!	#NULL!	#NULL!	0	0		0		0		0			0	0	1	0	0	0
CA20	20	-1.33	2016-09-16	1	1	2016-09-15	1	0	1		32	#NULL!	0	0	0	0	0	0	some vag. bleeding on DOB	3.99	3.99	51	36	39.6	#NULL!	8	8	1	#NULL!	#NULL!	#NULL!	#NULL!	#NULL!	1	1		0		1		0			2	1	0	0	1	7
CA21	21	0.94	2016-09-20	2	0	2016-09-15	5	1	0		26	#NULL!	0	0	0	0	0	0		3.459	3.354	53.34	36	40.4	#NULL!	#NULL!	#NULL!	0	#NULL!	#NULL!	#NULL!	#NULL!	#NULL!	0			0		0		0			0	0	1	0	0	0
CA22	22	2.92	2016-09-29	1	1	2016-09-23	6	0	1		27	#NULL!	0	0	0	0	0	0		2.83	2.8	48	33	37.2	#NULL!	8	9	0	#NULL!	#NULL!	#NULL!	#NULL!	#NULL!	1	0		0		0		0			2	2	0	0	1	15
CA23	23	0.07	2016-10-02	1	0	2016-09-27	5	1	5	Cauc/Brazil	34	#NULL!	1	0	0	0	0	0		3.385	3.26	50.8	#NULL!	39	#NULL!	9	9	0	#NULL!	#NULL!	#NULL!	#NULL!	#NULL!	1	0		0		0		0			0	0	1	0	0	0
CA24	24	-0.01	2016-10-16	1	0	2016-10-08	8	1	5	Cauc/Latino	28	#NULL!	0	0	0	0	0	0		3.061	#NULL!	44.5	#NULL!	38.5	#NULL!	#NULL!	#NULL!	0	#NULL!	#NULL!	#NULL!	#NULL!	#NULL!	0			0		0		0			0	0	1	0	0	0
CA25	25	-1.68	2016-10-19	1	1	2016-10-19	0	0	1		21	#NULL!	0	0	0	0	0	0		3.77	3.77	49	37	39	39	9	9	1	7.18	70	19	#NULL!	-4	1	3	elective for CHD	0		0		0			2	2	0	0	1	2
CA26	26	-3.79	2016-10-24	1	1	2016-10-22	2	0	5	Cauc/Asian	24	#NULL!	0	0	0	0	0	0		3.845	3.81	55.88	36	41	#NULL!	8	9	0	#NULL!	#NULL!	#NULL!	#NULL!	#NULL!	0			0		0		0			2	2	0	0	1	2
CA27	27	-4.08	2016-11-01	1	1	2016-10-31	1	0	1		27	#NULL!	0	0	0	0	0	0		3.08	3.08	51.4	34	39.4	#NULL!	8	8	1	#NULL!	#NULL!	#NULL!	#NULL!	#NULL!	0			0		0		0			2	2	0	0	1	1
CA28	28	1.42	2016-11-04	1	1	2016-11-03	1	1	1		34	#NULL!	0	0	0	0	0	0		3.53	3.53	50	36.5	39.4	39	9	9	1	7.26	61	11	27.4	-1	1	3	Placental abruption	0		1		0			0	2	0	0	1	3
CA29	29	-1.46	2016-11-07	1	1	2016-10-26	12	0	1		35	#NULL!	1	0	0	0	0	0	HSV	2.195	2.31	45	31	37.1	#NULL!	8	9	1	7.2	70	30	27	-2.3	1	0		0		0		0			1	1	1	1	0	7
CA30	30	-0.92	2016-11-07	1	1	2016-11-05	2	0	1		45	#NULL!	0	0	0	0	0	0		3.23	3.18	50	33	38.6	#NULL!	8	9	1	#NULL!	#NULL!	#NULL!	#NULL!	#NULL!	0			0		0		0			2	1	0	0	1	7
CA31	31	-0.5	2016-11-08	1	1	2016-11-02	6	0	1		42	#NULL!	0	0	0	0	0	0		3.195	3.4	52	34	38.4	#NULL!	8	9	0	#NULL!	#NULL!	#NULL!	#NULL!	#NULL!	1	0		0		0		0			1	0	1	0	0	15
CA32	32	-3.75	2016-11-09	1	1	2016-11-07	2	0	1		26	#NULL!	0	0	0	0	0	0	Polyhydramnios	2.35	2.43	46	32	38	36	8	9	1	#NULL!	#NULL!	#NULL!	#NULL!	#NULL!	1	1	bradycardia	0		5	NCPAP+5, PIP 10, 30%	0			2	2	0	0	1	10
CA33	33	-0.03	2016-11-23	1	0	2016-11-19	4	1	2		31	#NULL!	0	0	0	0	0	0		3.405	3.232	50.8	34.5	39.1	#NULL!	8	9	0	#NULL!	#NULL!	#NULL!	#NULL!	#NULL!	0			1		0		0			0	0	1	0	0	0
CA34	34	3.25	2016-11-29	1	1	2016-11-24	5	0	1		25	#NULL!	0	0	0	0	0	0		4.065	4.15	53.3	35	40.6	#NULL!	8	9	1	#NULL!	#NULL!	#NULL!	#NULL!	#NULL!	1	1		0		0		0			2	2	0	0	1	7
CA35	35	-3.29	2016-12-15	1	1	2016-12-14	1	1	0		41	#NULL!	0	0	0	0	0	0		4.015	4.015	53	36	38.6	#NULL!	8	8	1	#NULL!	#NULL!	#NULL!	#NULL!	#NULL!	0			0		0		0			2	2	0	0	1	8
CA36	36	-4.06	2016-12-18	1	1	2016-12-17	1	0	1		45	#NULL!	0	0	0	0	0	0		3.05	3.05	49	33	38.4	#NULL!	8	9	1	#NULL!	#NULL!	#NULL!	#NULL!	#NULL!	1			1		0		0			2	0	0	0	1	10
CA37		#NULL!	2016-12-22	1	0	2016-12-10	12	0	2		37	#NULL!	0	0	0	0	0	0	Fetal decels->c-section	3.685	3.365	49.53	#NULL!	39.5	#NULL!	#NULL!	#NULL!	0	#NULL!	#NULL!	#NULL!	#NULL!	#NULL!	1	1		0		0		0			0	0	1	0	0	0
CA38	38	0.71	2017-01-16	1	1	2017-01-13	3	0	1		40	#NULL!	0	0	0	0	0	0		3.2	3.26	48.5	34.5	39.5	#NULL!	9	9	1	#NULL!	#NULL!	#NULL!	#NULL!	#NULL!	0			0		0		0			2	2	0	0	1	15
CA39	39	-0.67	2017-01-19	1	1	2017-01-17	2	1	1		30	#NULL!	0	1	0	0	0	0		4.29	4.18	58.42	35.5	38	#NULL!	8	9	1	#NULL!	#NULL!	#NULL!	#NULL!	#NULL!	1	0		0		0		0			2	0	1	0	1	1
CA40	40	-0.63	2017-01-20	1	0	2017-01-11	9	1	0		27	#NULL!	0	1	0	0	0	0		2.92	3.005	50.8	#NULL!	39.1	#NULL!	8	9	0	#NULL!	#NULL!	#NULL!	#NULL!	#NULL!	0			1		0		0			0	0	1	0	0	0
CA41	41	-1.21	2017-01-23	1	1	2017-01-19	4	0	1		15	#NULL!	0	0	0	0	0	0		3.52	3.8	51.5	35.5	39.2	38	8	9	1	7.13	64	14	#NULL!	-9.2	0			0		0		0			2	2	1	0	0	1
CA42	42	-1.21	2017-02-02	1	0	2017-01-23	10	0	0		29	#NULL!	0	0	0	0	0	0		4.025	3.855	55.25	#NULL!	39	#NULL!	8	9	0	#NULL!	#NULL!	#NULL!	#NULL!	#NULL!	0			0		0		0			0	0	1	0	0	0
CA43	43	-1.04	2017-02-02	1	1	2017-02-01	1	1	0		24	#NULL!	0	0	0	0	0	0		3.515	3.47	52	34.5	38.1	#NULL!	9	9	1	7.25	61	27	#NULL!	-1	0			0		0		0			2	0	1	0	1	10
CA44	44	-0.63	2017-03-03	1	0	2017-02-27	4	1	5	Jap/Cauc	35	#NULL!	0	0	0	0	0	0		3.005	#NULL!	49.53	34.29	40.3	#NULL!	#NULL!	#NULL!	0	#NULL!	#NULL!	#NULL!	#NULL!	#NULL!	0			0		0		0			0	0	1	0	0	0
CAR 292		#NULL!	#NULL!	.	#NULL!	#NULL!	#NULL!	#NULL!	#NULL!	.	#NULL!	#NULL!	.	.	.	.	.	.	.	#NULL!	#NULL!	#NULL!	#NULL!	#NULL!	#NULL!	#NULL!	#NULL!	.	#NULL!	#NULL!	#NULL!	#NULL!	#NULL!	.	.	.	.	.	.	.	.	.		.	.	.	.	.	#NULL!
CAR 293		-3.496	#NULL!		1	#NULL!	2	1	1	.	#NULL!	#NULL!								3.62	#NULL!	48	34	38.6	#NULL!	#NULL!	#NULL!		#NULL!	#NULL!	#NULL!	#NULL!	#NULL!													1	0		9
CAR 294 (no neo assessment)		#NULL!	#NULL!	.	#NULL!	#NULL!	#NULL!	#NULL!	#NULL!	.	#NULL!	0	.	.	.	.	.	.	.	#NULL!	#NULL!	#NULL!	#NULL!	#NULL!	#NULL!	#NULL!	#NULL!	.	#NULL!	#NULL!	#NULL!	#NULL!	#NULL!	.	.	.	.	.	.	.	.	.		.	.	.	.	.	#NULL!
CAR 295		2.93	#NULL!		1	#NULL!	1	1	0	.	#NULL!	0								3.08	#NULL!	50	33.5	40.2	#NULL!	#NULL!	#NULL!		#NULL!	#NULL!	#NULL!	#NULL!	#NULL!													0	0		17
CAR 296		0.2	#NULL!		1	#NULL!	2	1	1	.	#NULL!	0								3.09	#NULL!	51	34	39.2	#NULL!	#NULL!	#NULL!		#NULL!	#NULL!	#NULL!	#NULL!	#NULL!													1	0		#NULL!
CAR 297		-2.469	#NULL!		1	#NULL!	1	1	1	.	#NULL!	0								3.78	#NULL!	50	36.5	39	#NULL!	#NULL!	#NULL!		#NULL!	#NULL!	#NULL!	#NULL!	#NULL!													1	0		10
CAR 298		0.255	#NULL!		1	#NULL!	1	1	2	.	#NULL!	0								2.485	#NULL!	42.5	34	37.5	#NULL!	#NULL!	#NULL!		#NULL!	#NULL!	#NULL!	#NULL!	#NULL!													0	0		#NULL!
CAR 299		-0.246	#NULL!		1	#NULL!	1	1	1	.	#NULL!	1								2.71	#NULL!	43	33	38.3	#NULL!	#NULL!	#NULL!		#NULL!	#NULL!	#NULL!	#NULL!	#NULL!													0	0		#NULL!
CAR 300		-2.748	#NULL!		1	#NULL!	6	1	1	.	#NULL!	2								3.795	#NULL!	52	36.5	39.1	#NULL!	#NULL!	#NULL!		#NULL!	#NULL!	#NULL!	#NULL!	#NULL!													1	0		17
CAR 301		0.71	#NULL!		1	#NULL!	2	1	#NULL!	.	#NULL!	0								2.48	#NULL!	43.2	31	37.4	#NULL!	#NULL!	#NULL!		#NULL!	#NULL!	#NULL!	#NULL!	#NULL!													1	0		17
CAR 303		-3.5	#NULL!		1	#NULL!	2	0	1	.	#NULL!	3								3.14	#NULL!	48	32.5	40.1	#NULL!	#NULL!	#NULL!		#NULL!	#NULL!	#NULL!	#NULL!	#NULL!													0	0		#NULL!
CAR 304		#NULL!	#NULL!	.	#NULL!	#NULL!	#NULL!	#NULL!	#NULL!	.	#NULL!	0	.	.	.	.	.	.	.	#NULL!	#NULL!	#NULL!	#NULL!	#NULL!	#NULL!	#NULL!	#NULL!	.	#NULL!	#NULL!	#NULL!	#NULL!	#NULL!	.	.	.	.	.	.	.	.	.		.	.	.	.	.	#NULL!
CAR 305		-1.341	#NULL!		1	#NULL!	2	1	0	.	#NULL!	4								3.02	#NULL!	48.5	33.5	37	#NULL!	#NULL!	#NULL!		#NULL!	#NULL!	#NULL!	#NULL!	#NULL!													1	0		#NULL!
CAR 306		-0.84	#NULL!		1	#NULL!	6	1	1	.	#NULL!	0								3	#NULL!	48	32.5	38.2	#NULL!	#NULL!	#NULL!		#NULL!	#NULL!	#NULL!	#NULL!	#NULL!													1	0		#NULL!
CAR 307		#NULL!	#NULL!	.	#NULL!	#NULL!	#NULL!	#NULL!	#NULL!	.	#NULL!	0	.	.	.	.	.	.	.	#NULL!	#NULL!	#NULL!	#NULL!	#NULL!	#NULL!	#NULL!	#NULL!	.	#NULL!	#NULL!	#NULL!	#NULL!	#NULL!	.	.	.	.	.	.	.	.	.		.	.	.	.	.	#NULL!
CAR 308		-1.762	#NULL!		1	#NULL!	0	0	1	.	#NULL!	3								3.13	#NULL!	49	32.5	39.1	#NULL!	#NULL!	#NULL!		#NULL!	#NULL!	#NULL!	#NULL!	#NULL!													1	0		#NULL!
CAR 309		#NULL!	#NULL!	.	#NULL!	#NULL!	#NULL!	#NULL!	#NULL!	.	#NULL!	0	.	.	.	.	.	.	.	#NULL!	#NULL!	#NULL!	#NULL!	#NULL!	#NULL!	#NULL!	#NULL!	.	#NULL!	#NULL!	#NULL!	#NULL!	#NULL!	.	.	.	.	.	.	.	.	.		.	.	.	.	.	#NULL!
CAR 310		-1.971	#NULL!		1	#NULL!	8	0	1	.	#NULL!	3								3.39	#NULL!	50	34	39.6	#NULL!	#NULL!	#NULL!		#NULL!	#NULL!	#NULL!	#NULL!	#NULL!													1	0		#NULL!
CAR 311		0.019	#NULL!		1	#NULL!	1	1	5	.	#NULL!	2								3.05	#NULL!	48.5	31	39	#NULL!	#NULL!	#NULL!		#NULL!	#NULL!	#NULL!	#NULL!	#NULL!													0	0		12
CAR 312		-7.222	#NULL!		1	#NULL!	4	0	1	.	#NULL!	2								3.05	#NULL!	53	35	37.1	#NULL!	#NULL!	#NULL!		#NULL!	#NULL!	#NULL!	#NULL!	#NULL!													0	0		#NULL!
CAR 314		#NULL!	#NULL!	.	#NULL!	#NULL!	#NULL!	#NULL!	#NULL!	.	#NULL!	0	.	.	.	.	.	.	.	#NULL!	#NULL!	#NULL!	#NULL!	#NULL!	#NULL!	#NULL!	#NULL!	.	#NULL!	#NULL!	#NULL!	#NULL!	#NULL!	.	.	.	.	.	.	.	.	.		.	.	.	.	.	#NULL!
CAR 315		-3.287	#NULL!		1	#NULL!	1	0	1	.	#NULL!	0								2.83	#NULL!	48	34	39.1	#NULL!	#NULL!	#NULL!		#NULL!	#NULL!	#NULL!	#NULL!	#NULL!													1	0		#NULL!
CAR 316		-3.243	#NULL!		1	#NULL!	4	1	1	.	#NULL!	2								3.79	#NULL!	53	34.5	38.2	#NULL!	#NULL!	#NULL!		#NULL!	#NULL!	#NULL!	#NULL!	#NULL!													0	0		#NULL!
CAR 317		-5.082	#NULL!		1	#NULL!	3	0	1	.	#NULL!	0								3.661	#NULL!	49.5	33	39	#NULL!	#NULL!	#NULL!		#NULL!	#NULL!	#NULL!	#NULL!	#NULL!													1	0		#NULL!
CAR 318		#NULL!	#NULL!	.	#NULL!	#NULL!	#NULL!	#NULL!	#NULL!	.	#NULL!	0	.	.	.	.	.	.	.	#NULL!	#NULL!	#NULL!	#NULL!	#NULL!	#NULL!	#NULL!	#NULL!	.	#NULL!	#NULL!	#NULL!	#NULL!	#NULL!	.	.	.	.	.	.	.	.	.		.	.	.	.	.	#NULL!
CAR 319		-3.742	#NULL!		1	#NULL!	2	1	1	.	#NULL!	2								2.45	#NULL!	45.72	33	39	#NULL!	#NULL!	#NULL!		#NULL!	#NULL!	#NULL!	#NULL!	#NULL!													0	0		11
CAR 320		#NULL!	#NULL!		1	#NULL!	4	1	1	.	#NULL!	0								2.815	#NULL!	49.5	32	38.3	#NULL!	#NULL!	#NULL!		#NULL!	#NULL!	#NULL!	#NULL!	#NULL!													1	0		17
CAR 321		-5.606	#NULL!		1	#NULL!	6	1	1	.	#NULL!	0								2.995	#NULL!	50.8	34.5	39.6	#NULL!	#NULL!	#NULL!		#NULL!	#NULL!	#NULL!	#NULL!	#NULL!													1	0		8
CAR 322		#NULL!	#NULL!	.	#NULL!	#NULL!	#NULL!	#NULL!	#NULL!	.	#NULL!	0	.	.	.	.	.	.	.	#NULL!	#NULL!	#NULL!	#NULL!	#NULL!	#NULL!	#NULL!	#NULL!	.	#NULL!	#NULL!	#NULL!	#NULL!	#NULL!	.	.	.	.	.	.	.	.	.		.	.	.	.	.	#NULL!
CAR 323		#NULL!	#NULL!	.	#NULL!	#NULL!	#NULL!	#NULL!	#NULL!	.	#NULL!	0	.	.	.	.	.	.	.	#NULL!	#NULL!	#NULL!	#NULL!	#NULL!	#NULL!	#NULL!	#NULL!	.	#NULL!	#NULL!	#NULL!	#NULL!	#NULL!	.	.	.	.	.	.	.	.	.		.	.	.	.	.	#NULL!
CAR 324		-2.363	#NULL!		1	#NULL!	4	0	#NULL!	.	#NULL!	2								2.96	#NULL!	45.5	32	40	#NULL!	#NULL!	#NULL!		#NULL!	#NULL!	#NULL!	#NULL!	#NULL!													0	0		13
CAR 325		#NULL!	#NULL!	.	#NULL!	#NULL!	#NULL!	#NULL!	#NULL!	.	#NULL!	0	.	.	.	.	.	.	.	#NULL!	#NULL!	#NULL!	#NULL!	#NULL!	#NULL!	#NULL!	#NULL!	.	#NULL!	#NULL!	#NULL!	#NULL!	#NULL!	.	.	.	.	.	.	.	.	.		.	.	.	.	.	#NULL!
CAR 326		#NULL!	#NULL!	.	#NULL!	#NULL!	#NULL!	#NULL!	#NULL!	.	#NULL!	0	.	.	.	.	.	.	.	#NULL!	#NULL!	#NULL!	#NULL!	#NULL!	#NULL!	#NULL!	#NULL!	.	#NULL!	#NULL!	#NULL!	#NULL!	#NULL!	.	.	.	.	.	.	.	.	.		.	.	.	.	.	#NULL!
CAR 327		0.159	#NULL!		1	#NULL!	4	0	1	.	#NULL!	3								3.249	#NULL!	52	35	40	#NULL!	#NULL!	#NULL!		#NULL!	#NULL!	#NULL!	#NULL!	#NULL!													1	0		6
CAR 328		0.733	#NULL!		1	#NULL!	6	1	0	.	#NULL!	5								2.49	#NULL!	47	34	37.2	#NULL!	#NULL!	#NULL!		#NULL!	#NULL!	#NULL!	#NULL!	#NULL!													1	0		17
CAR 329		0.995	#NULL!		1	#NULL!	3	1	1	.	#NULL!	3								3.32	#NULL!	49	35	39	#NULL!	#NULL!	#NULL!		#NULL!	#NULL!	#NULL!	#NULL!	#NULL!													1	0		13
CAR 330		#NULL!	#NULL!	.	#NULL!	#NULL!	#NULL!	#NULL!	#NULL!	.	#NULL!	0	.	.	.	.	.	.	.	#NULL!	#NULL!	#NULL!	#NULL!	#NULL!	#NULL!	#NULL!	#NULL!	.	#NULL!	#NULL!	#NULL!	#NULL!	#NULL!	.	.	.	.	.	.	.	.	.		.	.	.	.	.	#NULL!
CAR 331		0.298	#NULL!		1	#NULL!	4	0	2	.	#NULL!	4								3.98	#NULL!	53.34	35	39.3	#NULL!	#NULL!	#NULL!		#NULL!	#NULL!	#NULL!	#NULL!	#NULL!													1	0		10
CAR 332		#NULL!	#NULL!	.	#NULL!	#NULL!	#NULL!	#NULL!	#NULL!	.	#NULL!	0	.	.	.	.	.	.	.	#NULL!	#NULL!	#NULL!	#NULL!	#NULL!	#NULL!	#NULL!	#NULL!	.	#NULL!	#NULL!	#NULL!	#NULL!	#NULL!	.	.	.	.	.	.	.	.	.		.	.	.	.	.	#NULL!
CAR 333		-1.548	#NULL!		1	#NULL!	4	0	2	.	#NULL!	4								3.68	#NULL!	48	34	38.4	#NULL!	#NULL!	#NULL!		#NULL!	#NULL!	#NULL!	#NULL!	#NULL!													1	0		17
CAR 334		#NULL!	#NULL!	.	#NULL!	#NULL!	#NULL!	#NULL!	#NULL!	.	#NULL!	0	.	.	.	.	.	.	.	#NULL!	#NULL!	#NULL!	#NULL!	#NULL!	#NULL!	#NULL!	#NULL!	.	#NULL!	#NULL!	#NULL!	#NULL!	#NULL!	.	.	.	.	.	.	.	.	.		.	.	.	.	.	#NULL!
CAR 335		#NULL!	#NULL!	.	#NULL!	#NULL!	#NULL!	#NULL!	#NULL!	.	#NULL!	0	.	.	.	.	.	.	.	#NULL!	#NULL!	#NULL!	#NULL!	#NULL!	#NULL!	#NULL!	#NULL!	.	#NULL!	#NULL!	#NULL!	#NULL!	#NULL!	.	.	.	.	.	.	.	.	.		.	.	.	.	.	#NULL!
CAR 336		-0.449	#NULL!		1	#NULL!	4	1	1	.	#NULL!	2								3.38	#NULL!	47	32	40.2	#NULL!	#NULL!	#NULL!		#NULL!	#NULL!	#NULL!	#NULL!	#NULL!													1	0		17
CAR 337		-0.936	#NULL!		1	#NULL!	9	1	1	.	#NULL!	1								2.976	#NULL!	48	34	39.6	#NULL!	#NULL!	#NULL!		#NULL!	#NULL!	#NULL!	#NULL!	#NULL!													0	0		#NULL!
HC 1		2.09	#NULL!		0	#NULL!	9	0	#NULL!	.	#NULL!	5								3.374	#NULL!	#NULL!	#NULL!	41.2	#NULL!	#NULL!	#NULL!		#NULL!	#NULL!	#NULL!	#NULL!	#NULL!													1	.		99
HC 2		-2.174	#NULL!		0	#NULL!	9	0	1	.	#NULL!	4								3.374	#NULL!	50.8	#NULL!	38	#NULL!	#NULL!	#NULL!		#NULL!	#NULL!	#NULL!	#NULL!	#NULL!													1	0		99
HC 3		-0.34	#NULL!		0	#NULL!	14	0	3	.	#NULL!	5								4.22	#NULL!	50.8	#NULL!	39.6	#NULL!	#NULL!	#NULL!		#NULL!	#NULL!	#NULL!	#NULL!	#NULL!													1	0		99
HC 4		#NULL!	#NULL!		#NULL!	#NULL!	#NULL!	#NULL!	#NULL!	.	#NULL!	0								#NULL!	#NULL!	#NULL!	#NULL!	#NULL!	#NULL!	#NULL!	#NULL!		#NULL!	#NULL!	#NULL!	#NULL!	#NULL!													.	.		#NULL!
HC 5		-3.034	#NULL!		0	#NULL!	8	1	1		#NULL!	4								3.29	#NULL!	48.26	35.56	39.3	#NULL!	#NULL!	#NULL!		#NULL!	#NULL!	#NULL!	#NULL!	#NULL!													1	0		99
HC 6		#NULL!	#NULL!	.	#NULL!	#NULL!	#NULL!	#NULL!	#NULL!	.	#NULL!	0	.	.	.	.	.	.	.	#NULL!	#NULL!	#NULL!	#NULL!	#NULL!	#NULL!	#NULL!	#NULL!	.	#NULL!	#NULL!	#NULL!	#NULL!	#NULL!	.	.	.	.	.	.	.	.	.		.	.	.	.	.	#NULL!
HC 7 (withdrew-no neo info)		#NULL!	#NULL!	.	#NULL!	#NULL!	#NULL!	#NULL!	#NULL!	.	#NULL!	0	.	.	.	.	.	.	.	#NULL!	#NULL!	#NULL!	#NULL!	#NULL!	#NULL!	#NULL!	#NULL!	.	#NULL!	#NULL!	#NULL!	#NULL!	#NULL!	.	.	.	.	.	.	.	.	.		.	.	.	.	.	#NULL!
HC 8		#NULL!	#NULL!	.	#NULL!	#NULL!	#NULL!	#NULL!	#NULL!	.	#NULL!	0	.	.	.	.	.	.	.	#NULL!	#NULL!	#NULL!	#NULL!	#NULL!	#NULL!	#NULL!	#NULL!	.	#NULL!	#NULL!	#NULL!	#NULL!	#NULL!	.	.	.	.	.	.	.	.	.		.	.	.	.	.	#NULL!
HC 9		#NULL!	#NULL!	.	#NULL!	#NULL!	#NULL!	#NULL!	#NULL!	.	#NULL!	0	.	.	.	.	.	.	.	#NULL!	#NULL!	#NULL!	#NULL!	#NULL!	#NULL!	#NULL!	#NULL!	.	#NULL!	#NULL!	#NULL!	#NULL!	#NULL!	.	.	.	.	.	.	.	.	.		.	.	.	.	.	#NULL!
HC 10		#NULL!	#NULL!	.	#NULL!	#NULL!	#NULL!	#NULL!	#NULL!	.	#NULL!	0	.	.	.	.	.	.	.	#NULL!	#NULL!	#NULL!	#NULL!	#NULL!	#NULL!	#NULL!	#NULL!	.	#NULL!	#NULL!	#NULL!	#NULL!	#NULL!	.	.	.	.	.	.	.	.	.		.	.	.	.	.	#NULL!
HC 11		0.152	#NULL!		0	#NULL!	3	1	1	.	#NULL!	0								2.5	#NULL!	48	32.25	37.5	#NULL!	#NULL!	#NULL!		#NULL!	#NULL!	#NULL!	#NULL!	#NULL!													1	0		99
HC 12		-0.25	#NULL!		0	#NULL!	12	0	#NULL!	.	#NULL!	2								3.714	#NULL!	50.8	#NULL!	39	#NULL!	#NULL!	#NULL!		#NULL!	#NULL!	#NULL!	#NULL!	#NULL!													0	.		99
HC 13		-0.527	#NULL!		0	#NULL!	4	1	1	.	#NULL!	2								3.401	#NULL!	50	#NULL!	40	#NULL!	#NULL!	#NULL!		#NULL!	#NULL!	#NULL!	#NULL!	#NULL!													1	0		99
HC 14		-1.854	#NULL!		0	#NULL!	9	0	1	.	#NULL!	2								3.4	#NULL!	48.26	#NULL!	#NULL!	#NULL!	#NULL!	#NULL!		#NULL!	#NULL!	#NULL!	#NULL!	#NULL!													1	0		99
HC 15		#NULL!	#NULL!	.	#NULL!	#NULL!	#NULL!	#NULL!	#NULL!	.	#NULL!	0	.	.	.	.	.	.	.	#NULL!	#NULL!	#NULL!	#NULL!	#NULL!	#NULL!	#NULL!	#NULL!	.	#NULL!	#NULL!	#NULL!	#NULL!	#NULL!	.	.	.	.	.	.	.	.	.		.	.	.	.	.	#NULL!
HC 16		#NULL!	#NULL!	.	#NULL!	#NULL!	#NULL!	#NULL!	#NULL!	.	#NULL!	0	.	.	.	.	.	.	.	#NULL!	#NULL!	#NULL!	#NULL!	#NULL!	#NULL!	#NULL!	#NULL!	.	#NULL!	#NULL!	#NULL!	#NULL!	#NULL!	.	.	.	.	.	.	.	.	.		.	.	.	.	.	#NULL!
HC 17		1.634	#NULL!		0	#NULL!	7	0	0	.	#NULL!	4								3.005	#NULL!	48	#NULL!	37	#NULL!	#NULL!	#NULL!		#NULL!	#NULL!	#NULL!	#NULL!	#NULL!													1	0		99
HC 18 (withdrew-no neo info)		#NULL!	#NULL!		#NULL!	#NULL!	#NULL!	#NULL!	#NULL!	.	#NULL!	0								#NULL!	#NULL!	#NULL!	#NULL!	#NULL!	#NULL!	#NULL!	#NULL!		#NULL!	#NULL!	#NULL!	#NULL!	#NULL!													.	.		#NULL!
HC 19		-0.413	#NULL!		0	#NULL!	8	1	1	.	#NULL!	5								2.861	#NULL!	48.26	#NULL!	37.3	#NULL!	#NULL!	#NULL!		#NULL!	#NULL!	#NULL!	#NULL!	#NULL!													1	0		99
HC 20		#NULL!	#NULL!	.	#NULL!	#NULL!	#NULL!	#NULL!	#NULL!	.	#NULL!	0	.	.	.	.	.	.	.	#NULL!	#NULL!	#NULL!	#NULL!	#NULL!	#NULL!	#NULL!	#NULL!	.	#NULL!	#NULL!	#NULL!	#NULL!	#NULL!	.	.	.	.	.	.	.	.	.		.	.	.	.	.	#NULL!
HC 21		4.384	#NULL!		0	#NULL!	7	0	0	.	#NULL!	5								3.3	#NULL!	52.07	33	40.1	#NULL!	#NULL!	#NULL!		#NULL!	#NULL!	#NULL!	#NULL!	#NULL!													1	0		99
HC 22		#NULL!	#NULL!	.	#NULL!	#NULL!	#NULL!	#NULL!	#NULL!	.	#NULL!	0	.	.	.	.	.	.	.	#NULL!	#NULL!	#NULL!	#NULL!	#NULL!	#NULL!	#NULL!	#NULL!	.	#NULL!	#NULL!	#NULL!	#NULL!	#NULL!	.	.	.	.	.	.	.	.	.		.	.	.	.	.	#NULL!
HC 23 (premature- no neo info)		#NULL!	#NULL!	.	#NULL!	#NULL!	#NULL!	#NULL!	#NULL!	.	#NULL!	0	.	.	.	.	.	.	.	#NULL!	#NULL!	#NULL!	#NULL!	#NULL!	#NULL!	#NULL!	#NULL!	.	#NULL!	#NULL!	#NULL!	#NULL!	#NULL!	.	.	.	.	.	.	.	.	.		.	.	.	.	.	#NULL!
HC 24 (no neo info)		#NULL!	#NULL!	.	#NULL!	#NULL!	#NULL!	#NULL!	#NULL!	.	#NULL!	0	.	.	.	.	.	.	.	#NULL!	#NULL!	#NULL!	#NULL!	#NULL!	#NULL!	#NULL!	#NULL!	.	#NULL!	#NULL!	#NULL!	#NULL!	#NULL!	.	.	.	.	.	.	.	.	.		.	.	.	.	.	#NULL!
HC 25		#NULL!	#NULL!	.	#NULL!	#NULL!	#NULL!	#NULL!	#NULL!	.	#NULL!	0	.	.	.	.	.	.	.	#NULL!	#NULL!	#NULL!	#NULL!	#NULL!	#NULL!	#NULL!	#NULL!	.	#NULL!	#NULL!	#NULL!	#NULL!	#NULL!	.	.	.	.	.	.	.	.	.		.	.	.	.	.	#NULL!
HC 26		#NULL!	#NULL!	.	#NULL!	#NULL!	#NULL!	#NULL!	#NULL!	.	#NULL!	0	.	.	.	.	.	.	.	#NULL!	#NULL!	#NULL!	#NULL!	#NULL!	#NULL!	#NULL!	#NULL!	.	#NULL!	#NULL!	#NULL!	#NULL!	#NULL!	.	.	.	.	.	.	.	.	.		.	.	.	.	.	#NULL!
HC 27		#NULL!	#NULL!	.	#NULL!	#NULL!	#NULL!	#NULL!	#NULL!	.	#NULL!	0	.	.	.	.	.	.	.	#NULL!	#NULL!	#NULL!	#NULL!	#NULL!	#NULL!	#NULL!	#NULL!	.	#NULL!	#NULL!	#NULL!	#NULL!	#NULL!	.	.	.	.	.	.	.	.	.		.	.	.	.	.	#NULL!
HC 28		#NULL!	#NULL!	.	#NULL!	#NULL!	#NULL!	#NULL!	#NULL!	.	#NULL!	0	.	.	.	.	.	.	.	#NULL!	#NULL!	#NULL!	#NULL!	#NULL!	#NULL!	#NULL!	#NULL!	.	#NULL!	#NULL!	#NULL!	#NULL!	#NULL!	.	.	.	.	.	.	.	.	.		.	.	.	.	.	#NULL!
HC 29		-2.898	#NULL!		0	#NULL!	7	1	#NULL!	.	#NULL!	4								2.86	#NULL!	45.7	#NULL!	39.2	#NULL!	#NULL!	#NULL!		#NULL!	#NULL!	#NULL!	#NULL!	#NULL!													1	0		99
HC 30		#NULL!	#NULL!	.	#NULL!	#NULL!	#NULL!	#NULL!	#NULL!	.	#NULL!	0	.	.	.	.	.	.	.	#NULL!	#NULL!	#NULL!	#NULL!	#NULL!	#NULL!	#NULL!	#NULL!	.	#NULL!	#NULL!	#NULL!	#NULL!	#NULL!	.	.	.	.	.	.	.	.	.		.	.	.	.	.	#NULL!
HC 31		#NULL!	#NULL!	.	#NULL!	#NULL!	#NULL!	#NULL!	#NULL!	.	#NULL!	0	.	.	.	.	.	.	.	#NULL!	#NULL!	#NULL!	#NULL!	#NULL!	#NULL!	#NULL!	#NULL!	.	#NULL!	#NULL!	#NULL!	#NULL!	#NULL!	.	.	.	.	.	.	.	.	.		.	.	.	.	.	#NULL!
HC 32		#NULL!	#NULL!	.	#NULL!	#NULL!	#NULL!	#NULL!	#NULL!	.	#NULL!	0	.	.	.	.	.	.	.	#NULL!	#NULL!	#NULL!	#NULL!	#NULL!	#NULL!	#NULL!	#NULL!	.	#NULL!	#NULL!	#NULL!	#NULL!	#NULL!	.	.	.	.	.	.	.	.	.		.	.	.	.	.	#NULL!
HC 33		-5.891	#NULL!		0	#NULL!	6	0	5	.	#NULL!	2								4.17	#NULL!	54.61	#NULL!	40	#NULL!	#NULL!	#NULL!		#NULL!	#NULL!	#NULL!	#NULL!	#NULL!													1	0		99
HC 34		-1.814	#NULL!		0	#NULL!	7	0	1	.	#NULL!	2								3.515	#NULL!	52.71	#NULL!	37.3	#NULL!	#NULL!	#NULL!		#NULL!	#NULL!	#NULL!	#NULL!	#NULL!													1	0		99
HC 35		#NULL!	#NULL!	.	#NULL!	#NULL!	#NULL!	#NULL!	#NULL!	.	#NULL!	0	.	.	.	.	.	.	.	#NULL!	#NULL!	#NULL!	#NULL!	#NULL!	#NULL!	#NULL!	#NULL!	.	#NULL!	#NULL!	#NULL!	#NULL!	#NULL!	.	.	.	.	.	.	.	.	.		.	.	.	.	.	#NULL!
HC 36		1.646	#NULL!		0	#NULL!	12	0	1	.	#NULL!	4								3.12	#NULL!	49	#NULL!	37.5	#NULL!	#NULL!	#NULL!		#NULL!	#NULL!	#NULL!	#NULL!	#NULL!													1	0		99
HC 37		#NULL!	#NULL!	.	#NULL!	#NULL!	#NULL!	#NULL!	#NULL!	.	#NULL!	0	.	.	.	.	.	.	.	#NULL!	#NULL!	#NULL!	#NULL!	#NULL!	#NULL!	#NULL!	#NULL!	.	#NULL!	#NULL!	#NULL!	#NULL!	#NULL!	.	.	.	.	.	.	.	.	.		.	.	.	.	.	#NULL!
HC 38		-2.022	#NULL!		0	#NULL!	5	0	1	.	#NULL!	2								3.66	#NULL!	50.8	36	39.3	#NULL!	#NULL!	#NULL!		#NULL!	#NULL!	#NULL!	#NULL!	#NULL!													1	0		99
HC 39		#NULL!	#NULL!	.	#NULL!	#NULL!	#NULL!	#NULL!	#NULL!	.	#NULL!	0	.	.	.	.	.	.	.	#NULL!	#NULL!	#NULL!	#NULL!	#NULL!	#NULL!	#NULL!	#NULL!	.	#NULL!	#NULL!	#NULL!	#NULL!	#NULL!	.	.	.	.	.	.	.	.	.		.	.	.	.	.	#NULL!
HC 40 (premature- no neo info)		#NULL!	#NULL!		#NULL!	#NULL!	#NULL!	#NULL!	#NULL!	.	#NULL!	0								#NULL!	#NULL!	#NULL!	#NULL!	#NULL!	#NULL!	#NULL!	#NULL!		#NULL!	#NULL!	#NULL!	#NULL!	#NULL!													.	.		#NULL!
HC 41		#NULL!	#NULL!	.	#NULL!	#NULL!	#NULL!	#NULL!	#NULL!	.	#NULL!	0	.	.	.	.	.	.	.	#NULL!	#NULL!	#NULL!	#NULL!	#NULL!	#NULL!	#NULL!	#NULL!	.	#NULL!	#NULL!	#NULL!	#NULL!	#NULL!	.	.	.	.	.	.	.	.	.		.	.			.	#NULL!
HC 42		0.226	#NULL!		0	#NULL!	11	1	1	.	#NULL!	4								3.147	#NULL!	48.26	#NULL!	40	#NULL!	#NULL!	#NULL!		#NULL!	#NULL!	#NULL!	#NULL!	#NULL!													1	0		99
HC 43 (premature- no neo info)		#NULL!	#NULL!	.	#NULL!	#NULL!	#NULL!	#NULL!	#NULL!	.	#NULL!	0	.	.	.	.	.	.	.	#NULL!	#NULL!	#NULL!	#NULL!	#NULL!	#NULL!	#NULL!	#NULL!	.	#NULL!	#NULL!	#NULL!	#NULL!	#NULL!	.	.	.	.	.	.	.	.	.		.	.	.	.	.	#NULL!
HC 44		-1.931	#NULL!		0	#NULL!	5	1	1	.	#NULL!	4								3.32	#NULL!	48.26	#NULL!	37.4	#NULL!	#NULL!	#NULL!		#NULL!	#NULL!	#NULL!	#NULL!	#NULL!													1	0		99
HC 45		#NULL!	#NULL!	.	#NULL!	#NULL!	#NULL!	#NULL!	#NULL!	.	#NULL!	0	.	.	.	.	.	.	.	#NULL!	#NULL!	#NULL!	#NULL!	#NULL!	#NULL!	#NULL!	#NULL!	.	#NULL!	#NULL!	#NULL!	#NULL!	#NULL!	.	.	.	.	.	.	.	.	.		.	.	.	.	.	#NULL!
HC 46		#NULL!	#NULL!	.	#NULL!	#NULL!	#NULL!	#NULL!	#NULL!	.	#NULL!	0	.	.	.	.	.	.	.	#NULL!	#NULL!	#NULL!	#NULL!	#NULL!	#NULL!	#NULL!	#NULL!	.	#NULL!	#NULL!	#NULL!	#NULL!	#NULL!	.	.	.	.	.	.	.	.	.		.	.	.	.	.	#NULL!
HC 47		-7.528	#NULL!		0	#NULL!	5	0	0	.	#NULL!	4								3.969	#NULL!	58.42	36.195	40	#NULL!	#NULL!	#NULL!		#NULL!	#NULL!	#NULL!	#NULL!	#NULL!													1	0		99
HC 48		#NULL!	#NULL!	.	#NULL!	#NULL!	#NULL!	#NULL!	#NULL!	.	#NULL!	#NULL!	.	.	.	.	.	.	.	#NULL!	#NULL!	#NULL!	#NULL!	#NULL!	#NULL!	#NULL!	#NULL!	.	#NULL!	#NULL!	#NULL!	#NULL!	#NULL!	.	.	.	.	.	.	.	.	.		.	.	.	.	.	#NULL!
HC 49		#NULL!	#NULL!	.	#NULL!	#NULL!	#NULL!	#NULL!	#NULL!	.	#NULL!	#NULL!	.	.	.	.	.	.	.	#NULL!	#NULL!	#NULL!	#NULL!	#NULL!	#NULL!	#NULL!	#NULL!	.	#NULL!	#NULL!	#NULL!	#NULL!	#NULL!	.	.	.	.	.	.	.	.	.		.	.	.	.	.	#NULL!
HC 50		#NULL!	#NULL!	.	#NULL!	#NULL!	#NULL!	#NULL!	#NULL!	.	#NULL!	#NULL!	.	.	.	.	.	.	.	#NULL!	#NULL!	#NULL!	#NULL!	#NULL!	#NULL!	#NULL!	#NULL!	.	#NULL!	#NULL!	#NULL!	#NULL!	#NULL!	.	.	.	.	.	.	.	.	.		.	.	.	.	.	#NULL!
HC 51		#NULL!	#NULL!		#NULL!	#NULL!	#NULL!	#NULL!	#NULL!		#NULL!	#NULL!								#NULL!	#NULL!	#NULL!	#NULL!	#NULL!	#NULL!	#NULL!	#NULL!		#NULL!	#NULL!	#NULL!	#NULL!	#NULL!																#NULL!
HC 52		#NULL!	#NULL!	.	#NULL!	#NULL!	#NULL!	#NULL!	#NULL!	.	#NULL!	#NULL!	.	.	.	.	.	.	.	#NULL!	#NULL!	#NULL!	#NULL!	#NULL!	#NULL!	#NULL!	#NULL!	.	#NULL!	#NULL!	#NULL!	#NULL!	#NULL!	.	.	.	.	.	.	.	.	.		.	.	.	.	.	#NULL!
HC 53		#NULL!	#NULL!	.	#NULL!	#NULL!	#NULL!	#NULL!	#NULL!	.	#NULL!	#NULL!	.	.	.	.	.	.	.	#NULL!	#NULL!	#NULL!	#NULL!	#NULL!	#NULL!	#NULL!	#NULL!	.	#NULL!	#NULL!	#NULL!	#NULL!	#NULL!	.	.	.	.	.	.	.	.	.		.	.	.	.	.	#NULL!
HC 54		#NULL!	#NULL!	.	#NULL!	#NULL!	#NULL!	#NULL!	#NULL!	.	#NULL!	#NULL!	.	.	.	.	.	.	.	#NULL!	#NULL!	#NULL!	#NULL!	#NULL!	#NULL!	#NULL!	#NULL!	.	#NULL!	#NULL!	#NULL!	#NULL!	#NULL!	.	.	.	.	.	.	.	.	.		.	.	.	.	.	#NULL!
HC 55		#NULL!	#NULL!	.	#NULL!	#NULL!	#NULL!	#NULL!	#NULL!	.	#NULL!	#NULL!	.	.	.	.	.	.	.	#NULL!	#NULL!	#NULL!	#NULL!	#NULL!	#NULL!	#NULL!	#NULL!	.	#NULL!	#NULL!	#NULL!	#NULL!	#NULL!	.	.	.	.	.	.	.	.	.		.	.	.	.	.	#NULL!
HC 56		#NULL!	#NULL!	.	#NULL!	#NULL!	#NULL!	#NULL!	#NULL!	.	#NULL!	#NULL!	.	.	.	.	.	.	.	#NULL!	#NULL!	#NULL!	#NULL!	#NULL!	#NULL!	#NULL!	#NULL!	.	#NULL!	#NULL!	#NULL!	#NULL!	#NULL!	.	.	.	.	.	.	.	.	.		.	.	.	.	.	#NULL!
HC 57		#NULL!	#NULL!	.	#NULL!	#NULL!	#NULL!	#NULL!	#NULL!	.	#NULL!	#NULL!	.	.	.	.	.	.	.	#NULL!	#NULL!	#NULL!	#NULL!	#NULL!	#NULL!	#NULL!	#NULL!	.	#NULL!	#NULL!	#NULL!	#NULL!	#NULL!	.	.	.	.	.	.	.	.	.		.	.	.	.	.	#NULL!
[truncated: 162 more columns]
